# Supplementary material for: Self-assembly oxygen sensing thin film based on a Ru(ii) complex covalently grafted to porous anodized alumina oxide (AAO) templates
Source: Royal Society of Chemistry journal article supplement (doi:10.1039/c5ra07809a), 2015-01-01
Supplement: c5ra07809a1.pdf [file c5ra07809a1.pdf]

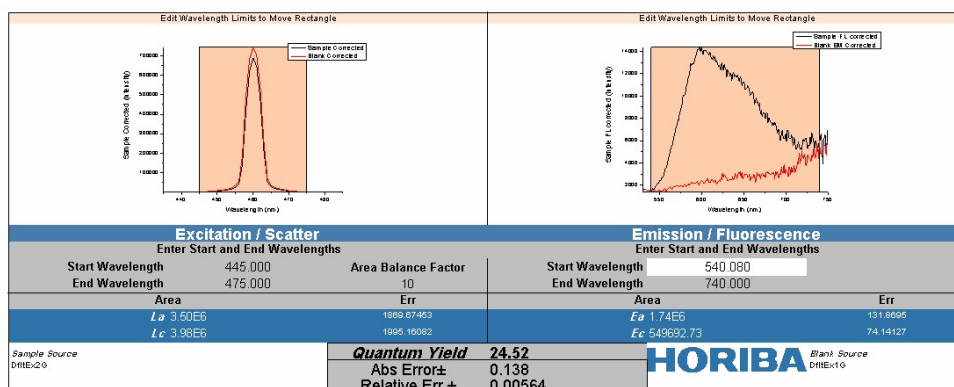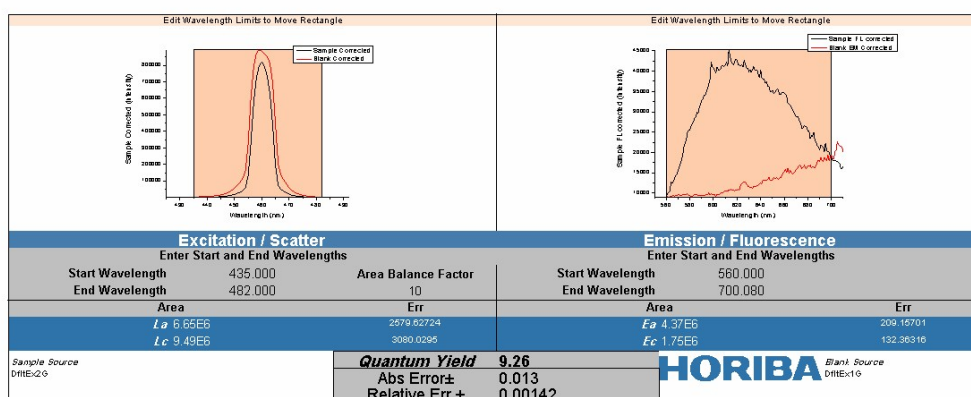

Figure 3S. fluorescence quantum yield of  $[\text{Ru}(\text{bpy})_2(\text{phen-NH}_2)](\text{PF}_6)_2$  in  $\text{CH}_2\text{Cl}_2$  and  $[\text{Ru}(\text{bpy})_2(\text{phen-NH})/\text{GPMS}/\text{AAO}]$
